# Supplementary material for: Open-Source, Adaptable, All-in-One Smartphone-Based System for Quantitative Analysis of Point-of-Care Diagnostics
Source: MDPI journal article supplement (doi:10.3390/diagnostics12030589), 2022-02-25
Supplement: s1 [file s1]

| Study                                                    | LOB nM (study) | LOB nM (LFApp) | LOD nM (study) | LOD nM (LFApp) | LOQ nM (study) | LOQ nM (LFApp) |
|----------------------------------------------------------|----------------|----------------|----------------|----------------|----------------|----------------|
| Ruppert et al., 2019 Digoxigenin calibration (iPhone 5S) | 13,1           | 8,21           | 31,3           | 28             | 123,7          | 84             |
| Ruppert et al., 2019 Digoxigenin serum (iPhone 5S)       | 29,2           | 4,59           | 39,4           | 11,6           | 77,2           | 34,9           |
| Ruppert et al., 2019 Digoxigenin calibration (Bioimager) | 17,2           | 5,01           | 29,7           | 17,1           | 86,8           | 51,2           |
| Ruppert et al., 2019 Digoxigenin serum (Bioimager)       | 29,2           | 3,15           | 39,4           | 7,97           | 77,2           | 23,9           |
| Mahmoud et al., 2020 Thrombin (Huawei P30 Pro)*          | na             | 3,12           | 3              | 12,6           | na             | 37,9           |
| Mahmoud et al., 2020 IL-6 (Huawei P30 Pro)               | na             | 9,55           | 100            | 38,6           | na             | 116            |
| Ruppert et al., 2020 CRP (Bioimager)                     | 0,33           | 1,09           | 1,27           | 2,57           | 5,52           | 7,7            |
| Ruppert et al., 2020 IL-6 (Bioimager)                    | 0,46           | 0,792          | 2,28           | 1,86           | 7,33           | 5,58           |

**Supplementary Table S1.** Side-by-side comparison of LOB, LOD, LOQ values computed by our system and the reported values of other studies.

\*reported values are calculated by fitting non-linear calibration model.

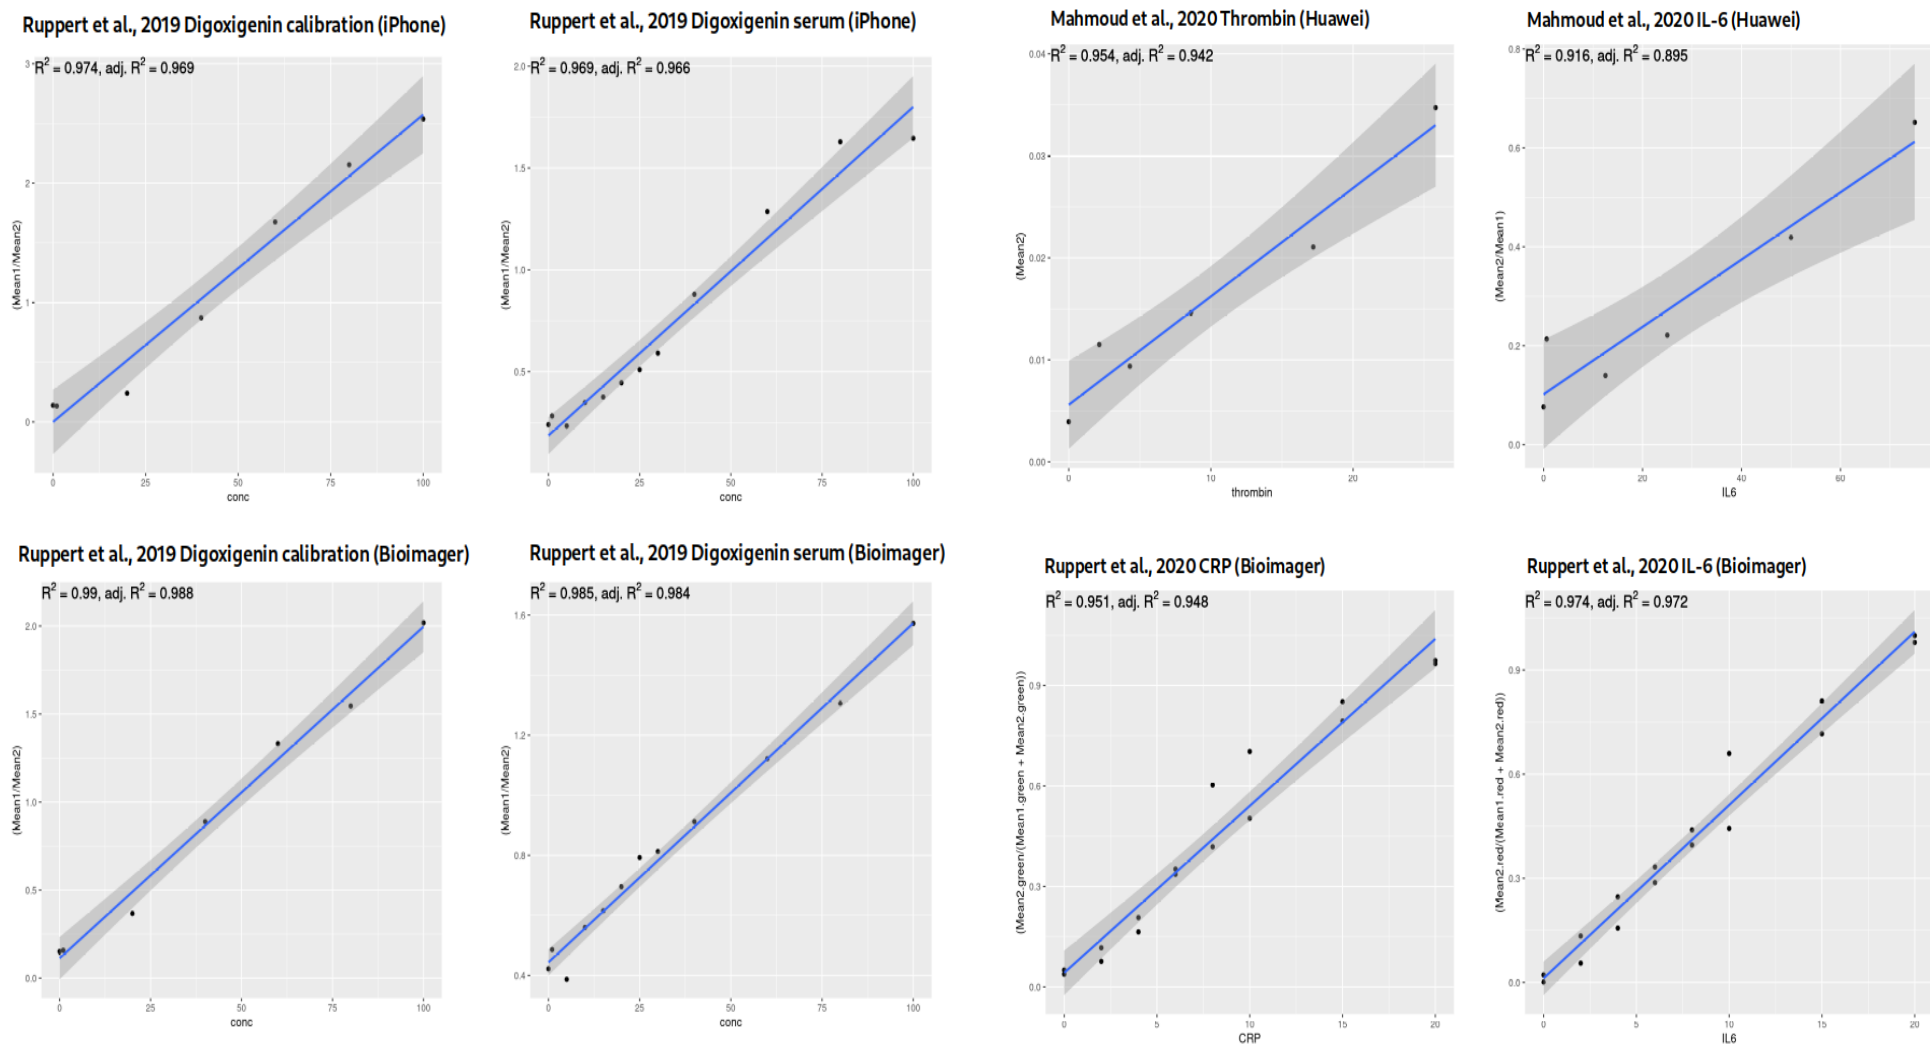

**Supplementary Figure S1.** Calibration curves computed by LFApp with the data provided by Ruppert et al. 2019, Ruppert et al. 2020 and Mahmoud et al. 2020.
